# Supplementary material for: Production of Biopolymer Precursors Beta-Alanine And L-Lactic Acid From CO2 With Metabolically Versatile Rhodococcus Opacus DSM 43205
Source: Research Square preprint supplement (doi:10.21203/rs.3.rs-1302786/v1), 2022-02-02
Supplement: Supplementary file 1 [file f12dc4b648479ff141f5f756.docx]

Additional file 1

# Production of biopolymer precursors beta-alanine and lactic acid from CO2 with metabolically versatile *Rhodococcus opacus*

Table 1. List of optimized gene sequences.

| Gene | Nucleotide sequence |
| --- | --- |
| *panD* | ATGCTCCGCACCATCCTCGGCTCCAAGATCCACCGCGCCACCGTCACCCAGGCCGACCTCGACTACGTCGGCTCCGTCACCATCGACGCCGACCTCGTCCACGCCGCCGGCCTCATCGAGGGCGAGAAGGTCGCCATCGTCGACATCACCAACGGCGCCCGCCTCGAGACTTACGTCATCGTCGGCGACGCCGGCACCGGCAACATCTGCATCAACGGCGCCGCCGCCCACCTCATCAACCCCGGCGACCTCGTCATCATCATGTCCTACCTCCAGGCCACCGACGCCGAGGCCAAGGCCTACGAGCCCAAGATCGTCCACGTCGACGCCGACAACCGCATCGTCGCCCTCGGCAACGACCTCGCCGAGGCCCTCCCCGGCTCAGGCCTCCTCACCTCCCGCTCCATCTAA |
| Pf*ldh* | ATGGCCCCCAAGGCCAAGATCGTCCTCGTCGGCTCCGGCATGATCGGCGGCGTCATGGCCACCCTCATCGTCCAGAAGAACCTCGGCGACGTCGTCCTCTTCGACATCGTCAAGAACATGCCCCACGGCAAGGCCCTCGACACCTCCCACACCAACGTCATGGCCTACTCCAACTGCAAGGTATCCGGCTCCAACACCTACGACGACCTCGCCGGCGCCGACGTCGTCATCGTCACCGCCGGCTTCACCAAGGCCCCCGGCAAGTCCGACAAGGAGTGGAACCGCGACGACCTCCTCCCCCTCAACAACAAGATCATGATCGAGATCGGCGGCCACATCAAGAAGAACTGCCCCAACGCCTTCATCATCGTCGTCACCAACCCCGTCGACGTCATGGTCCAGCTCCTCCACCAGCACTCCGGCGTCCCCAAGAACAAGATCATCGGCCTCGGCGGCGTCCTCGACACCTCCCGCCTCAAGTACTACATCTCCCAGAAGCTCAACGTCTGCCCCCGCGACGTCAACGCCCACATCGTCGGCGCCCACGGCAACAAGATGGTCCTCCTCAAGCGCTACATCACCGTCGGCGGCATCCCCCTCCAGGAGTTCATCAACAACAAGCTCATCTCCGACGCCGAGCTCGAGGCCATCTTCGACCGCACCGTCAACACCGCCCTCGAGATCGTCAACCTCCACGCCTCCCCCTACGTCGCCCCCGCCGCCGCCATCATCGAGATGGCCGAGTCCTACCTCAAGGACCTCAAGAAGGTCCTCATCTGCTCCACCCTCCTCGAGGGCCAGTACGGCCACTCCGACATCTTCGGCGGCACCCCCGTCGTCCTCGGCGCCAACGGCGTCGAGCAGGTCATCGAGCTCCAGCTCAACTCCGAGGAGAAGGCCAAGTTCGACGAGGCCATCGCCGAGACTAAGCGCATGAAGGCCCTCGCCTAA |
| Lh*ldh* | ATGGCCCGCGAGGAGAAGCCCCGCAAGGTCATCCTCGTCGGCGACGGCGCCGTCGGCTCCACCTTCGCCTTCTCCATGGTCCAGCAGGGCATCGCCGAGGAGCTCGGCATCATCGACATCGCCAAGGAGCACGTCGAGGGCGACGCCATCGACCTCGCCGACGCCACCCCCTGGACCTCCCCCAAGAACATCTACGCCGCCGACTACCCCGACTGCAAGGACGCCGACCTCGTCGTCATCACCGCCGGCGCCCCCCAGAAGCCCGGCGAGACTCGCCTCGACCTCGTCAACAAGAACCTCAAGATCCTCTCCTCCATCGTCGAGCCCGTCGTCGAGTCCGGCTTCGAGGGCATCTTCCTCGTCGTCGCCAACCCCGTCGACATCCTCACCCACGCCACCTGGCGCATGTCCGGCTTCCCCAAGGACCGCGTCATCGGCTCCGGCACCTCCCTCGACACCGGCCGCCTCCAGAAGGTCATCGGCAAGATGGAGAACGTCGACCCCTCCTCCGTCAACGCCTACATGCTCGGCGAGCACGGCGACACCGAGTTCCCCGCCTGGTCCTACAACAACGTCGCCGGCGTCAAGGTCGCCGACTGGGTCAAGGCCCACAACATGCCCGAGTCCAAGCTCGAGGACATCCACCAGGAGGTCAAGGACATGGCCTACGACATCATCAACAAGAAGGGCGCCACCTTCTACGGCATCGGCACCGCCTCCGCCATGATCGCCAAGGCCATCCTCAACGACGAGCACCGCGTCCTCCCCCTCTCCGTCCCCATGGACGGCGAGTACGGCCTCCACGACCTCCACATCGGCACCCCCGCCGTCGTCGGCCGCAAGGGCCTCGAGCAGGTCATCGAGATGCCCCTCTCCGACAAGGAGCAGGAGCTCATGACCGCCTCCGCCGACCAGCTCAAGAAGGTCATGGACAAGGCCTTCAAGGAGACTGGCGTCAAGGTCCGCCAGTAA |

Figure 1: RuBiSCo and hydrogenases found in the *Rhodococcus opacus* DSM 43205 assembly confirming the hydrogen oxidizing autotrophic (HOA) activity. The largest seven contigs are shown in the picture with markings of where RuBiSCo (green color labels) and hydrogenases (red color labels) were found. Note that the NAD-reducing hydrogenase HoxS subunits (EC: 1.12.1.2) found on contigs 2 and 5 are relevant for HOA activity, but not the periplasmic NiFeSe hydrogenaes subunits found on contig 1.
